# Supplementary material
Source: HighWire-hosted journal article supplement (https://ijssurgery.com/content/8301)
Supplement: inline-supplementary-material-4 [file inline-supplementary-material-4.docx]

**Supplemental Table 4.** Odds of Complications Among Unmatched Control Cohort Who Underwent Single-Level Anterior Lumbar Interbody Fusion Surgeries Compared to Bone Morphogenetic Protein Treatment Cohort

| **Postoperative Complications** | |
| --- | --- |
| Pseudarthrosis | 0.71(0.579 – 0.876) |
| Revision Surgery | 0.955 (0.828 – 1.102) |
