# Supplementary material
Source: HighWire-hosted journal article supplement (https://ijssurgery.com/content/8301)
Supplement: inline-supplementary-material-5 [file inline-supplementary-material-5.docx]

**Supplemental Table 5.** Multivariate Regression Models for Pseudarthrosis and Revision Surgery Occurring in the Unmatched Population Undergoing Single-Level Anterior Lumbar Interbody Fusion Surgeries

|  | **Pseudarthrosis**  *OR (95% CI)* | **Revision Surgery**  *OR (95% CI)* |
| --- | --- | --- |
| **Age** | | |
| 65 – 69 | *Reference value* |  |
| 70 – 74 | 0.84 (0.65 – 1.07) | 0.88 (0.75 – 1.04) |
| 75 – 79 | 0.96 (0.72 – 1.26) | 1.02 (0.84 – 1.23) |
| 80 – 84 | 0.61 (0.37 – 0.96) | 0.63 (0.45 – 0.85) |
| **Sex** | | |
| Female | *Reference value* |  |
| Male | 1.15 (0.92 – 1.43) | 1.12 (0.96 – 1.30) |
| **Comorbidities** | | |
| Body Mass Index > 30 kg/m2 | 1.39 (0.95 – 1.97) | 1.19 (0.90 – 1.56) |
| Diabetes Mellitus | 1.26 (0.98 – 1.61) | 1.21 (1.01 – 1.44) |
| Chronic Kidney Disease | 0.86 (0.51 – 1.37) | 1.03 (0.73 – 1.41) |
| Hypertension | 1.46 (1.15 – 1.85)* | 1.08 (0.93 – 1.27) |
| Smoking | 1.24 (0.91 – 1.67) | 1.49 (1.21 – 1.82) |
| Rheumatoid Arthritis | 1.39 (0.85 – 2.15) | 1.27 (0.88 – 1.77) |
| Osteoporosis | 1.79 (1.32 – 2.39)* | 1.14 (0.89 – 1.44) |
| **BMP+ Treatment Cohort** | 1.41 (1.15 – 1.74)* | 1.05 (0.91 – 1.22) |
| **Odds Ratio (95% Confidence Interval)*  *+Bone morphogenetic protein* | | |
